# Supplementary material for: Hybrid Silica-Based Fillers in Nanocomposites: Influence of Isotropic/Isotropic and Isotropic/Anisotropic Fillers on Mechanical Properties of Styrene-Butadiene (SBR)-Based Rubber
Source: MDPI journal article supplement (doi:10.3390/polym13152413), 2021-07-22
Supplement: s1 [file s1]

## Supporting information

Table S1: Mixing energies required to process nanocomposites with different fillers.

| Sample                    | Energy (kJ) |
|---------------------------|-------------|
| 200 MP – 80 phr           | 80          |
| Sepiolite – 80 phr        | 55          |
| Stöber – 80 phr           | 50          |
| 200 MP/ Sepiolite – 70/10 | 75          |
| 200 MP/ Sepiolite– 60/20  | 73          |
| 200 MP/ Sepiolite– 50/30  | 68          |
| 200 MP/ Stöber– 70/10     | 68          |
| 200 MP/ Stöber – 60/20    | 63          |
| 200 MP/ Stöber – 50/30    | 58          |
